# Supplementary material for: Self-supplying Cu2+ and H2O2 synergistically enhancing disulfiram-mediated melanoma chemotherapy
Source: Royal Society of Chemistry journal article supplement (doi:10.1039/d4ra01075b), 2024-01-01
Supplement: d4ra01075b3.pdf [file d4ra01075b3.pdf]

## Supporting Information

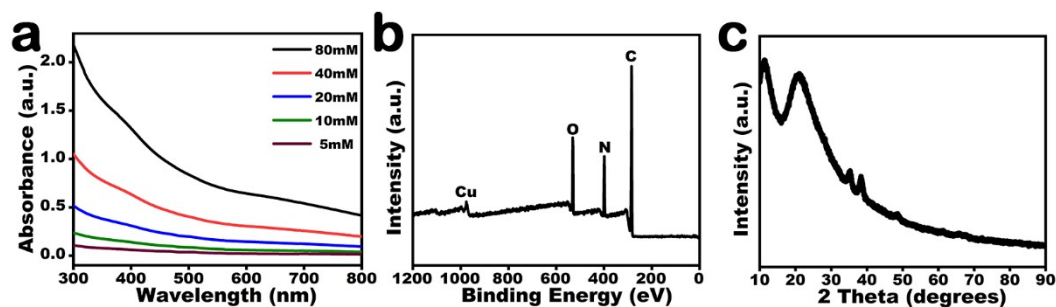

**Figure S1.** (a) UV-vis absorption spectrum of CPNDs. (b) Survey XPS spectra of CPNDs. (c) XRD pattern of CPNDs.

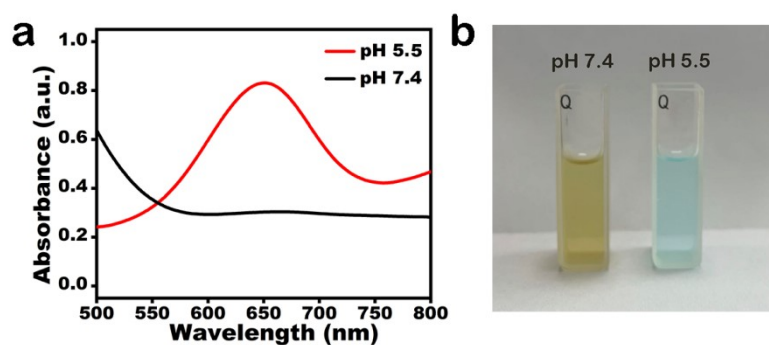

**Figure S2.** (a) UV-vis spectra of TMB aqueous solution of CPNDs in different pH conditions. (b) Digital photograph of  $\bullet\text{OH}$  generated by CPNDs at different pH values based on TMB assay.

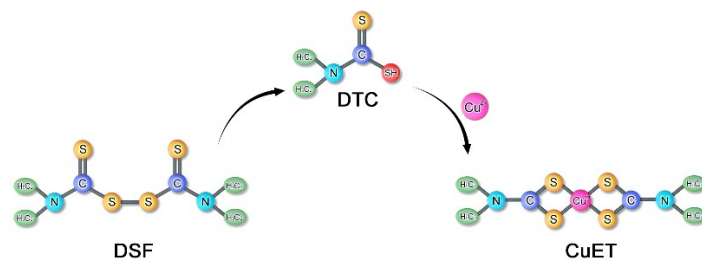

**Figure S3.** Mechanism of DSF/Cu<sup>2+</sup> reactions.

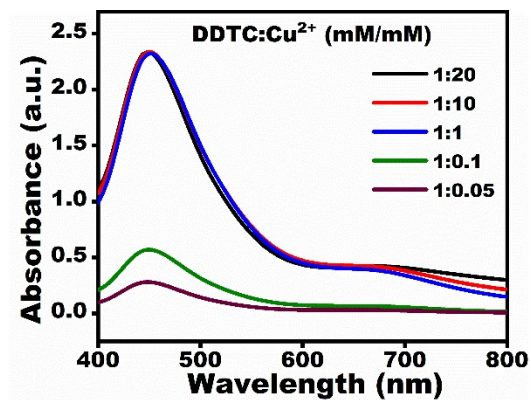

Figure S4. UV-vis absorption spectrum of CuET.

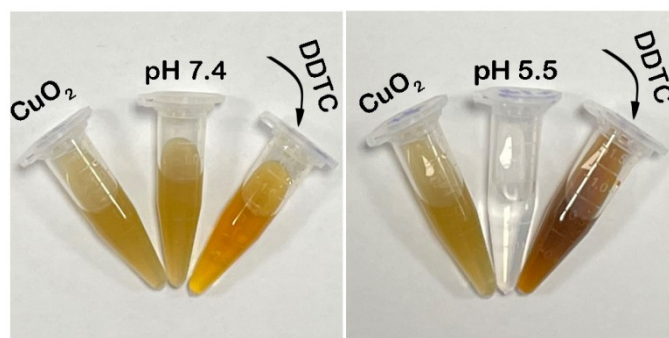

Figure S5. Digital photograph of the reaction between DDTC and CPNDs at different pH values.

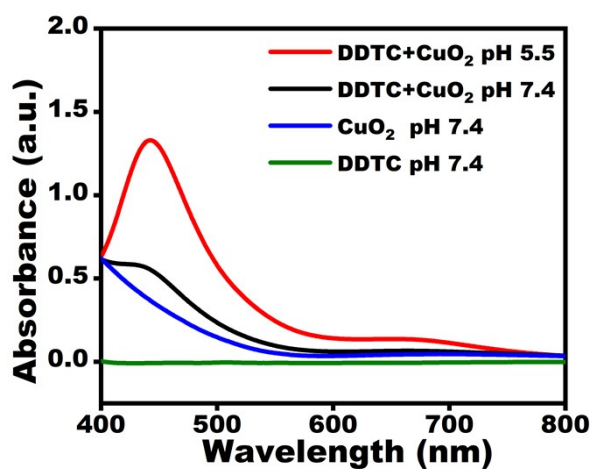

Figure S6. UV-vis spectra of DDTC, CPNDs, and their mixture in different pH conditions.

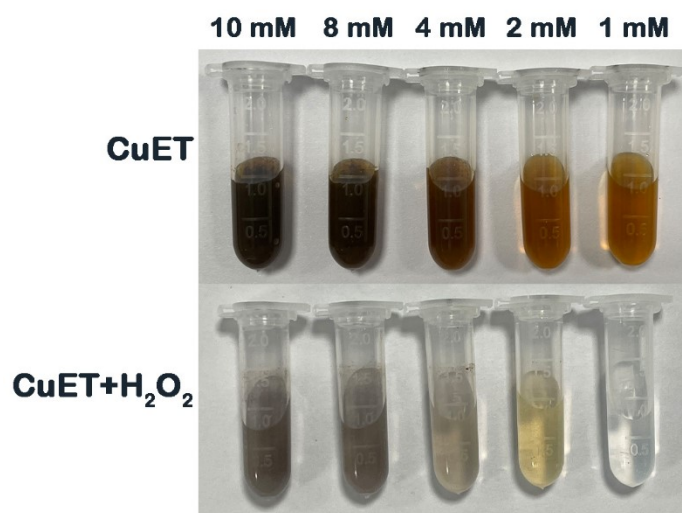

**Figure S7.** Digital photograph of the decomposition of CuET under oxidation condition.

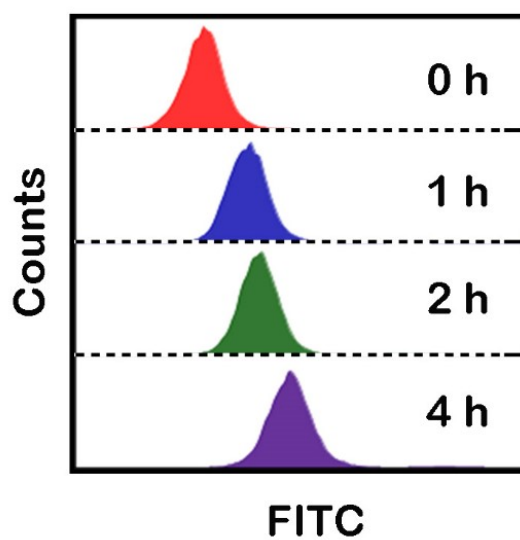

**Figure S8.** Flow cytometry analysis of A375 cells after different treatments.

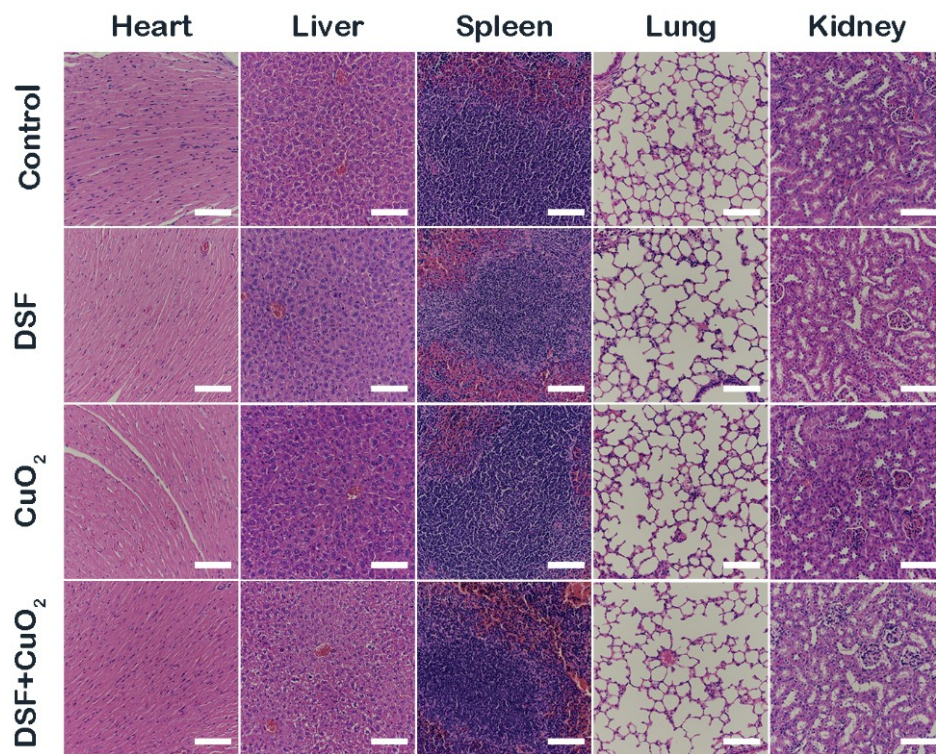

**Figure S9.** H&E staining of major organs (heart, liver, spleen, lung, and kidney) after different treatments, scale bar is 100μm.
