# Supplementary figures and images for: Self-supplying Cu2+ and H2O2 synergistically enhancing disulfiram-mediated melanoma chemotherapy
Source: Royal Society of Chemistry journal article supplement (doi:10.1039/d4ra01075b), 2024-01-01

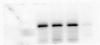

Supplement: d4ra01075b1.pdf [file d4ra01075b1.pdf]

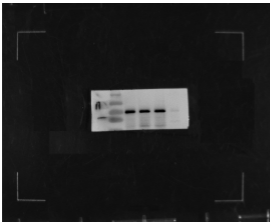

Supplement: d4ra01075b2.pdf [file d4ra01075b2.pdf]

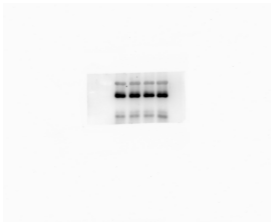

Supplement: d4ra01075b4.pdf [file d4ra01075b4.pdf]

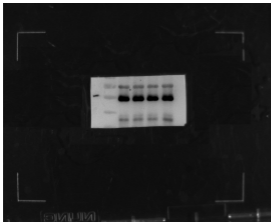

Supplement: d4ra01075b5.pdf [file d4ra01075b5.pdf]
